# Supplementary material
Source: Royal Society of Chemistry journal article supplement (doi:10.1039/d6eb00077k)
Supplement: d6eb00077k1.pdf [file d6eb00077k1.pdf]

## Supplementary Materials

### **Insight and regulation of interfacial coordination chemistry of high-voltage LiCoPO<sub>4</sub> cathode via functionalized carbon layer anchoring for robust surface passivation**

Moo Hyun Woo <sup>a</sup> and George P. Demopoulos <sup>a\*</sup>

<sup>1</sup> Materials Engineering, McGill University, 3610 rue University, Montréal, QC H3A 0C5, Canada

\* Corresponding author: Prof. George P. Demopoulos, email: [george.demopoulos@mcgill.ca](mailto:george.demopoulos@mcgill.ca); ORCID# [https://orcid.org/ 0000-0001-8112-5339](https://orcid.org/0000-0001-8112-5339)

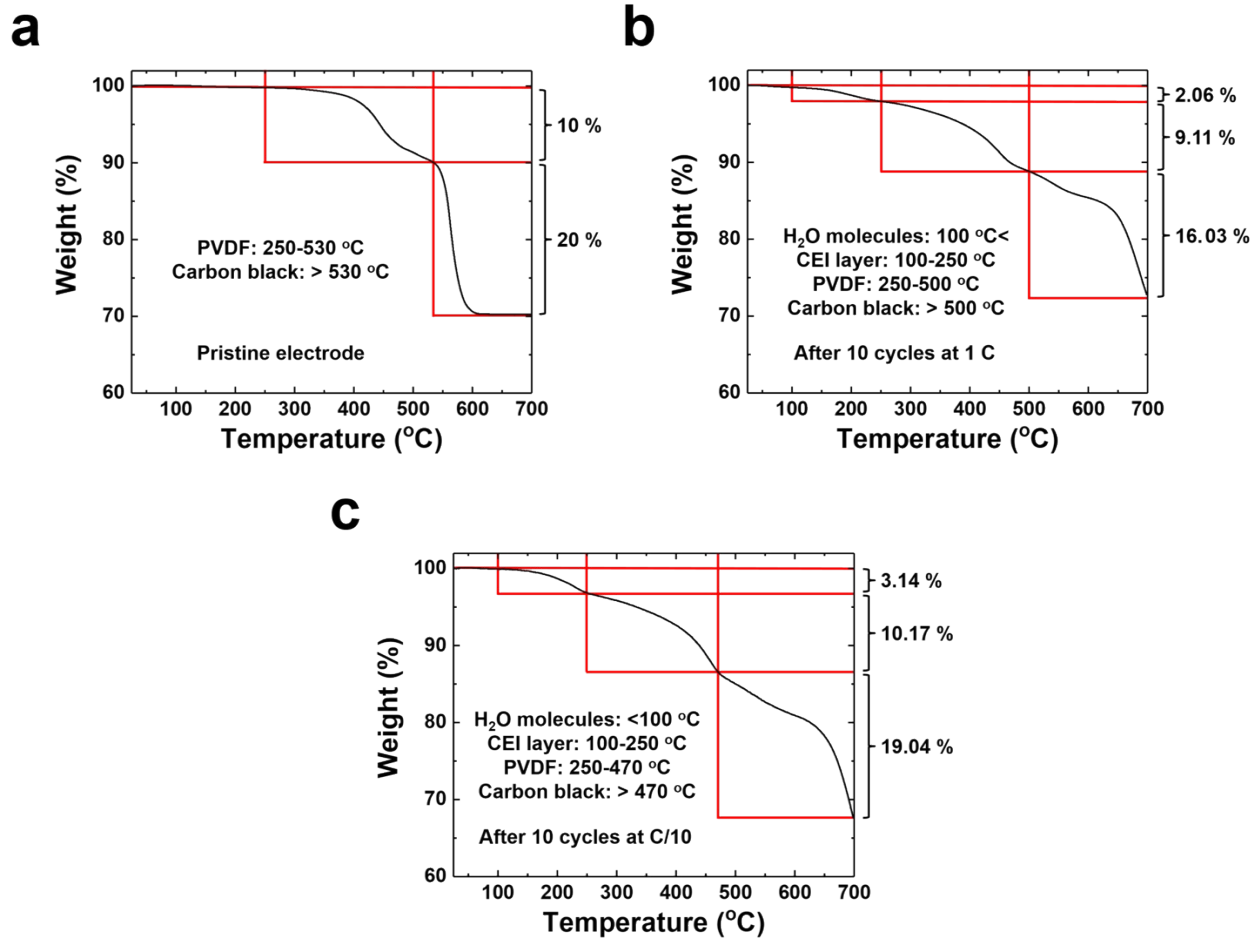

**Figure S1.** TGA curves of (a) pristine and cycled electrodes after 10 cycles at (b) 1 C and (c) C/10 over the whole temperature range up to 700 °C.

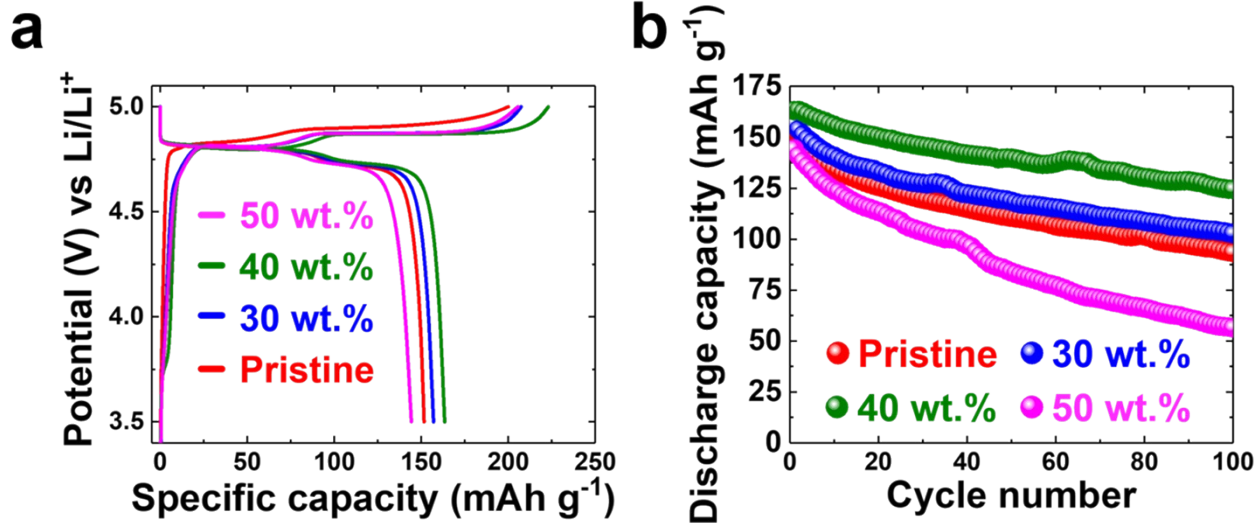

**Figure S2.** Electrochemical evaluations on the effect of functionalized carbon layer via (a) galvanostatic charge-discharging and (b) capacity retention with different amount of sucrose, measured within the voltage range 3.5-5.0 V vs. Li/Li<sup>+</sup> at 1 C.

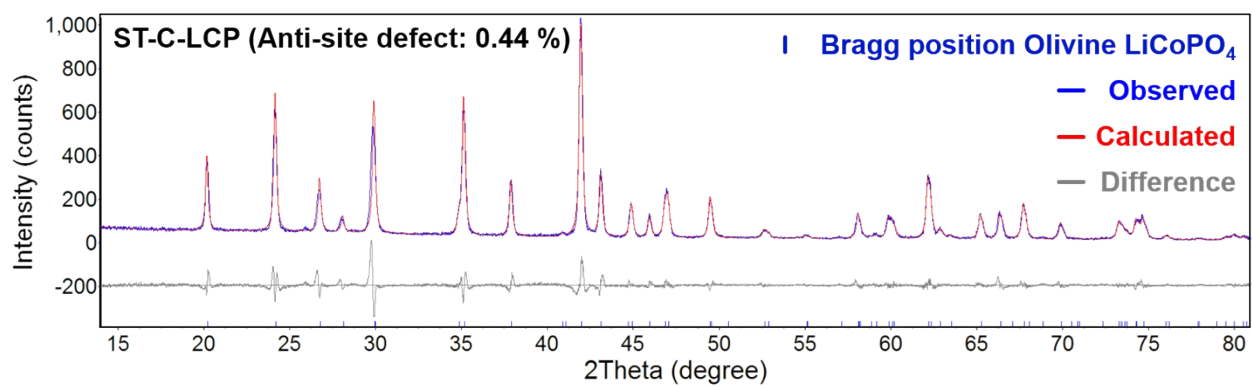

**Figure S3.** Rietveld refinement result of ST-C-LCP based on XRD pattern.

**Table S1.** Refined XRD data of ST-C-LCP.

| ST-C-LCP                           |        |
|------------------------------------|--------|
| $a$ (Å)                            | 10.19  |
| $b$ (Å)                            | 5.92   |
| $c$ (Å)                            | 4.70   |
| Unit cell volume (Å <sup>3</sup> ) | 283.53 |
| Grain size (nm)                    | 67.3   |
| Anti-site defect concentration (%) | 0.44   |
| $R_{wp}$ (%)                       | 6.52   |

| Peak | Bond          | Binding energy<br>(eV) | FWHM<br>(eV) | Atomic % |
|------|---------------|------------------------|--------------|----------|
| C 1s | C=C & C-C     | 284.77                 | 1.26         | 52.82    |
|      | C-OH          | 285.33                 | 1.43         | 20.93    |
|      | C-O-C         | 286.53                 | 1.31         | 9.18     |
|      | C=O           | 289.32                 | 1.86         | 3.99     |
|      | COOH          | 291.17                 | 3.51         | 6.20     |
|      | $\pi$ - $\pi$ | 287.76                 | 1.64         | 6.87     |
| O 1s | P-O & C=O     | 531.23                 | 1.02         | 4.20     |
|      | COOH          | 532.28                 | 1.56         | 43.76    |
|      | C-OH          | 533.35                 | 1.38         | 30.60    |
|      | C-O-C         | 534.20                 | 1.81         | 21.43    |

**Table S2.** XPS peak data summary of as-synthesized ST-C-LCP powder.

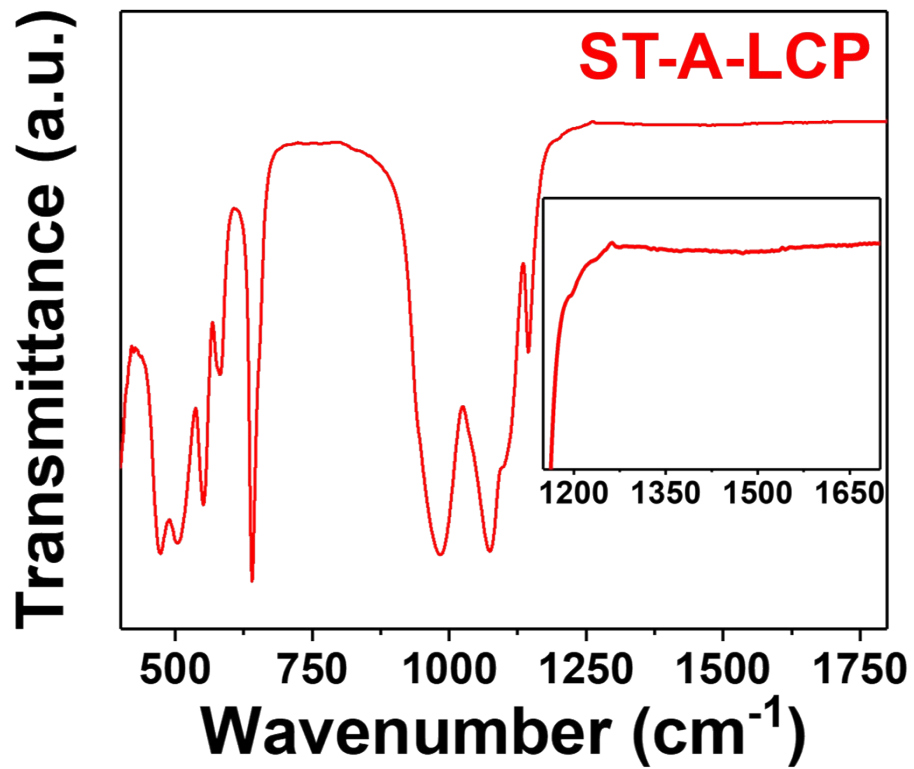

Figure S4. FT-IR spectrum of ST-A-LCP.

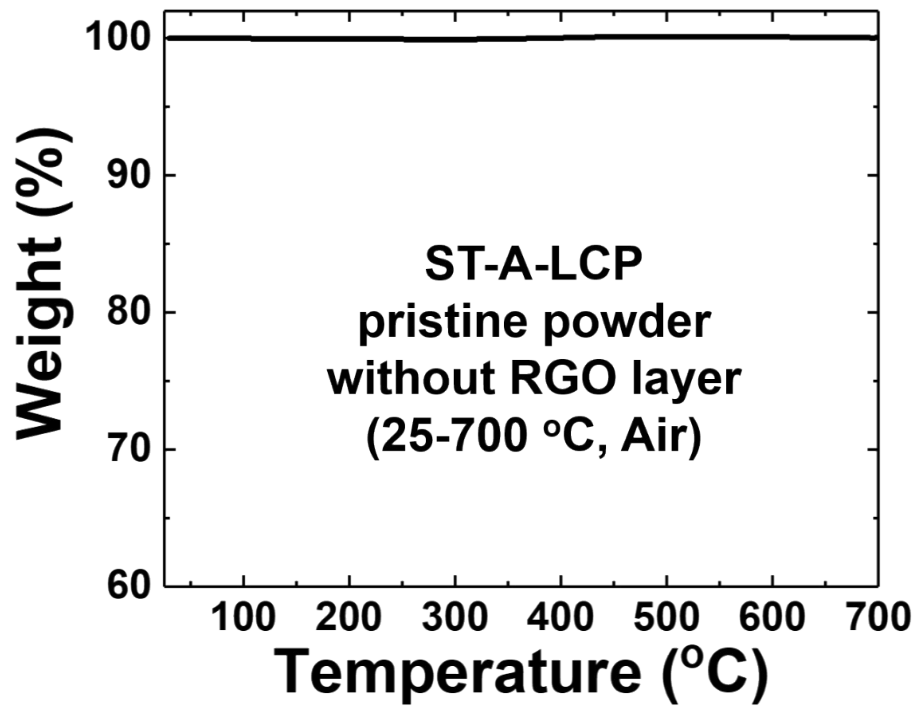

**Figure S5.** TGA curves of ST-A-LCP powder without FCL coating over the whole temperature range up to 700 °C in air.

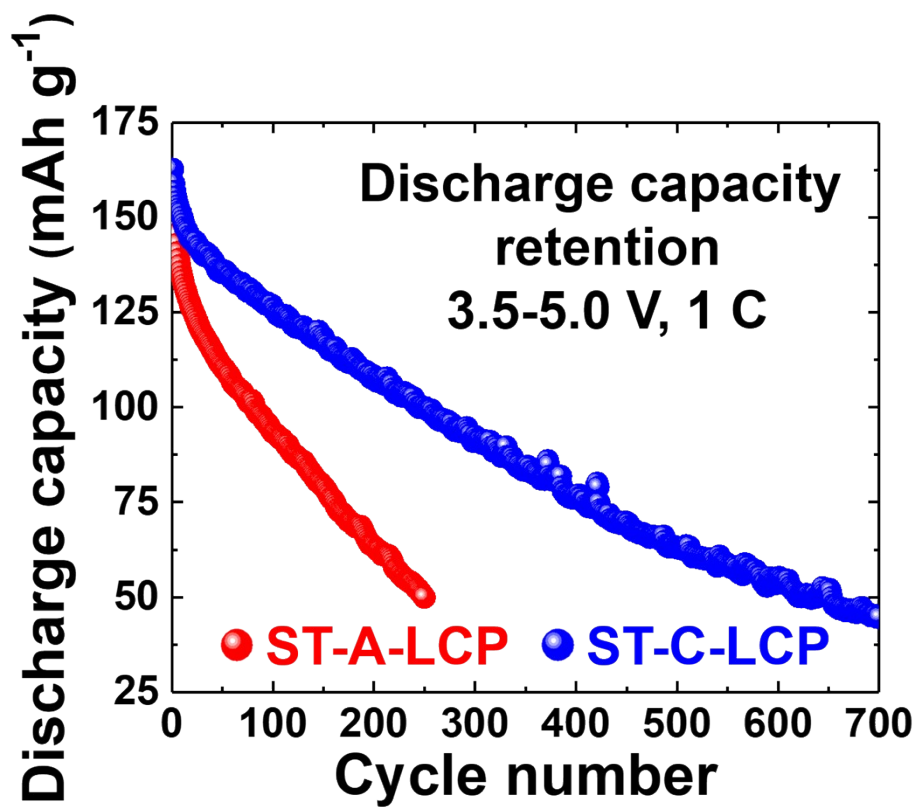

Figure S6. Comparison of discharge capacity retention of ST-A-LCP and ST-C-LCP at 1 C.

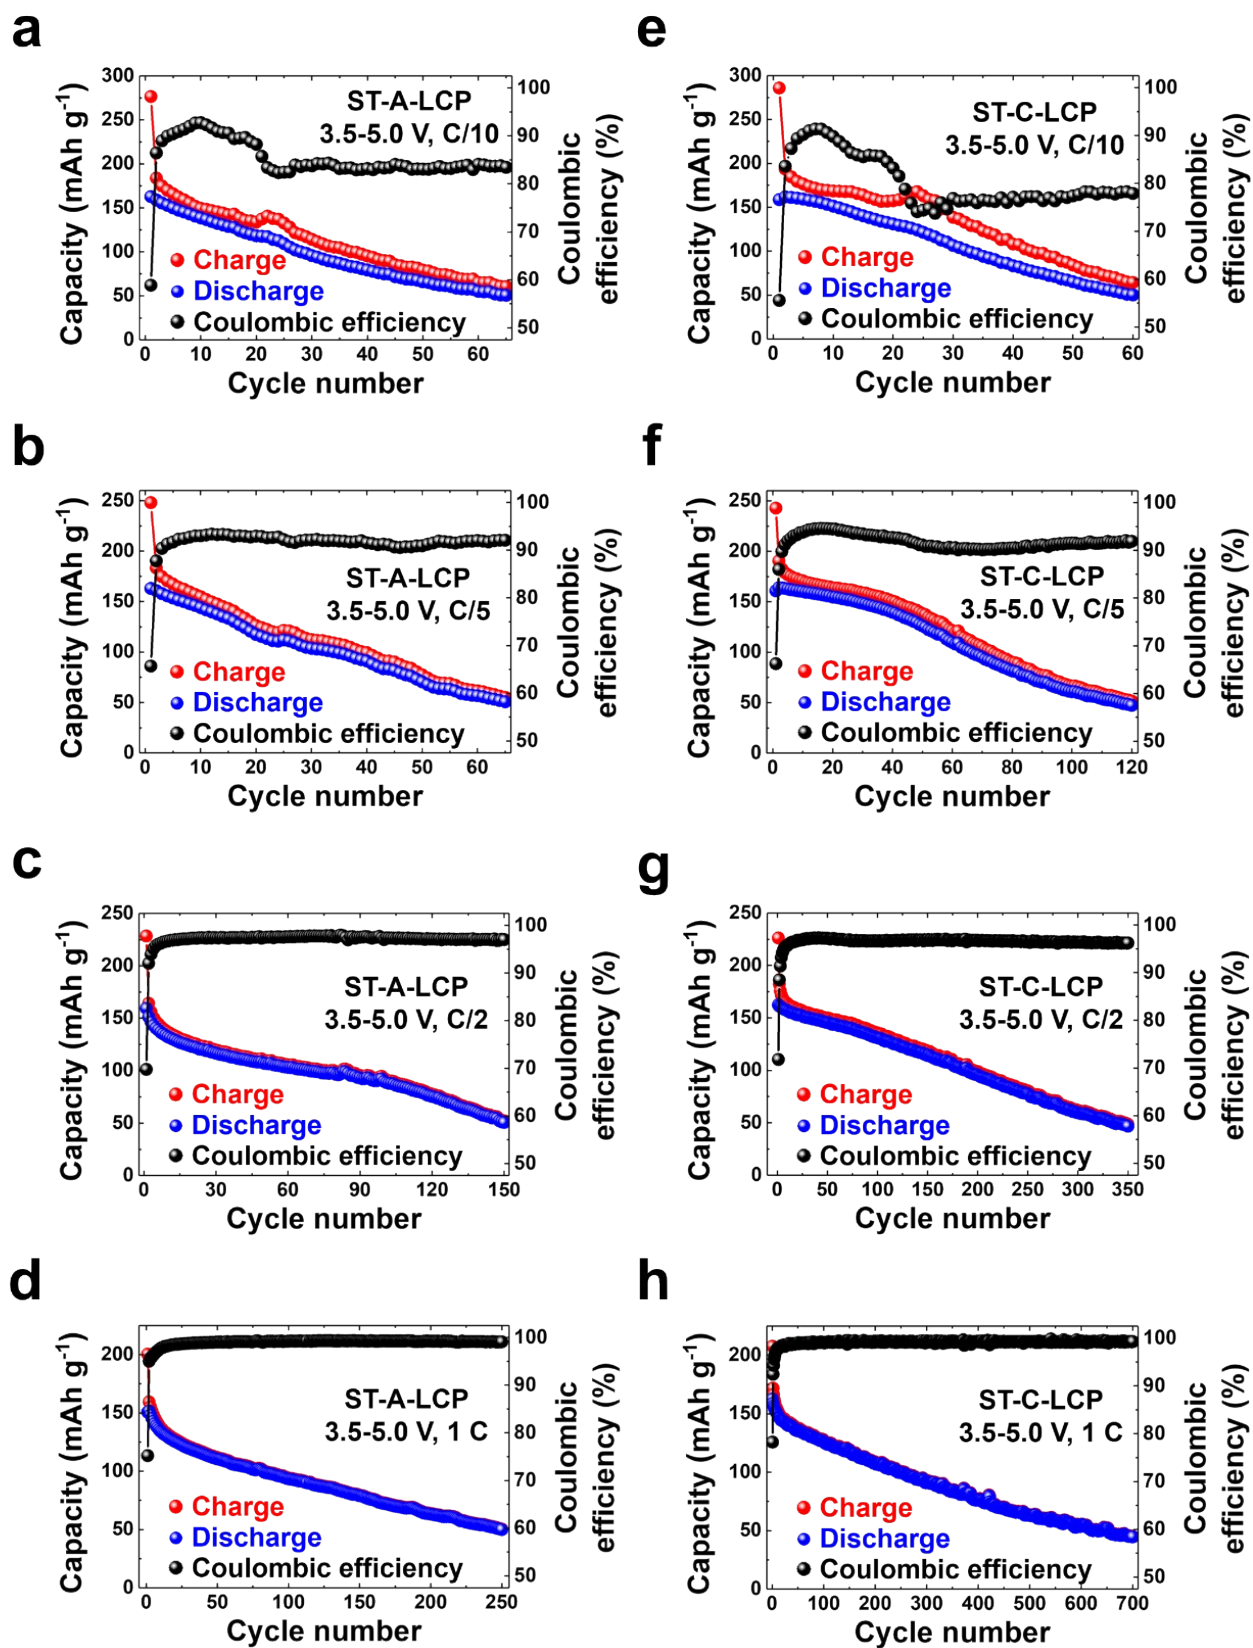

**Figure S7.** Capacity retention and Coulombic efficiency of ST-A-LCP and ST-C-LCP within the voltage range 3.5-5.0 V vs. Li/Li<sup>+</sup> at different C-rates.

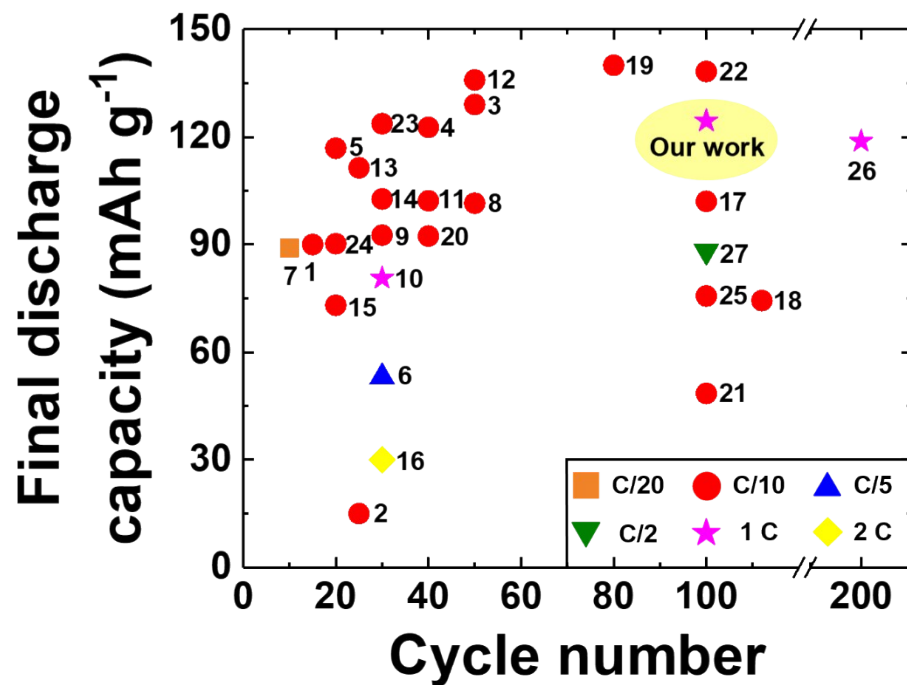

**Figure S8.** Comparative evaluation of final discharge capacity as a function of cycle number for ST-C-LCP and previously reported carbon-coated LCP systems at various C-rates.

**Table S3.** Comprehensive summary of experimental parameters for the surveyed carbon-coated LCP literatures.

| Carbon source | Electrode composition (wt.%)    | Electrolyte                                                           | Voltage range (V) | Initial discharge capacity (mAh g <sup>-1</sup> ) & C-rate | Capacity retention     | Ref. |
|---------------|---------------------------------|-----------------------------------------------------------------------|-------------------|------------------------------------------------------------|------------------------|------|
| MWCNT         | 75:12.5:12.5<br>(AM:Carbon:TAB) | 1 M LiPF <sub>6</sub> in EC/DEC = 1:1 (v/v)                           | 3.5-5.0           | 120, C/10                                                  | 75 % after 15 cycles   | 1    |
| Glucose       | 75:12.5:12.5<br>(AM:Carbon:TAB) | 1 M LiPF <sub>6</sub> in EC/DEC = 1:1 (v/v)                           | 3.5-5.0           | 52, C/10                                                   | 28.8 % after 25 cycles | 2    |
| Glucose       | 70:20:10<br>(AM:CB:PVDF)        | 1 M LiPF <sub>6</sub> in EC/DMC = 1:1 (v/v)                           | 3.2-5.1           | 133, C/10                                                  | 97 % after 50 cycles   | 3    |
| AB            | 70:20:10<br>(AM:AB:PVDF)        | 1 M LiPF <sub>6</sub> in EC/DMC = 1:1 (v/v)                           | 2.5-5.1           | 141, C/10                                                  | 87 % after 40 cycles   | 4    |
| Citric acid   | 85:10:5<br>(AM:CB:PVDF)         | 1 M LiPF <sub>6</sub> in EC/DEC = 1:1 (v/v) with 1 wt.% LiBOB         | 3.0-5.0           | 123, C/10                                                  | 95 % after 20 cycles   | 5    |
| Glucose       | 80:10:10<br>(AM:AB:PVDF)        | 1 M LiPF <sub>6</sub> in EC/DMC = 1:1 (v/v)                           | 2.0-5.0           | 108, C/5                                                   | 49.1 % after 30 cycles | 6    |
| PEDOT, MWCNT  | 83:10:7<br>(AM:AB:PTFE)         | 1 M LiPF <sub>6</sub> in EC/DEC = 1:1 (v/v)                           | 3.5-5.0           | 130, C/20                                                  | 68.5 % after 10 cycles | 7    |
| AB            | 80:12.5:7.5<br>(AM:CB:PVDF)     | 1 M LiPF <sub>6</sub> in EC/DEC = 1:1 (v/v)                           | 3.0-5.0           | 145, C/10                                                  | 70 % after 50 cycles   | 8    |
| Citric acid   | 75:20:5<br>(AM:AB:PTEE)         | 1 M LiPF <sub>6</sub> in EC/DEC/EMC = 1:1:1 (v/v/v) with 0.1 wt.% TPN | 3.5-5.2           | 136.2, C/10                                                | 68 % after 30 cycles   | 9    |
| AB            | 70:20:10<br>(AM:AB:PVDF)        | 1 M LiPF <sub>6</sub> in EC/DMC = 1:1 (v/v)                           | 2.5-5.0           | 128, 1 C                                                   | 63 % after 30 cycles   | 10   |
| Citric acid   | 80:10:10<br>(AM:AB:PVDF)        | 1 M LiPF <sub>6</sub> in EC/DMC = 1:1 (v/v)                           | 3.0-5.2           | 131, C/10                                                  | 78 % after 40 cycles   | 11   |
| PVP           | 80:10:10<br>(AM:MWCNT:PVDF)     | 1 M LiPF <sub>6</sub> in EC/DEC = 1:1 (w/w)                           | 3-5.1             | 153, C/10                                                  | 88.8 % after 50 cycles | 12   |

|                               |                                   |                                                                                         |         |                |                                  |    |
|-------------------------------|-----------------------------------|-----------------------------------------------------------------------------------------|---------|----------------|----------------------------------|----|
| Kerosene,<br>Heptane          | 70:20:10<br>(AM:AB:PVDF)          | 1 M LiPF <sub>6</sub> in<br>EC/DMC = 1:1<br>(v/v)                                       | 2.5-5.1 | 128,<br>C/10   | 87 %<br>after<br>25 cycles       | 13 |
| Propane                       | 80:10:10<br>(AM:CB:PVDF)          | 1 M LiPF <sub>6</sub> in<br>EC/DMC = 1:1<br>(v/v)                                       | 3.0-5.0 | 130,<br>C/10   | 79 %<br>after<br>30 cycles       | 14 |
| Sucrose                       | 80:10:10<br>(AM:AB:PTFE)          | 1 M LiPF <sub>6</sub> in<br>EC/DMC = 1:1<br>(v/v)                                       | 3.0-5.1 | 130,<br>C/10   | 56.2 %<br>after<br>20 cycles     | 15 |
| Ethylene<br>glycol            | 90:5:5<br>(AM:CB:PVDF)            | 1 M LiPF <sub>6</sub> in<br>EC/DMC = 1:1<br>(v/v)                                       | 2.5-5.5 | 114,<br>2 C    | 26.3 %<br>after<br>30 cycles     | 16 |
| Sucrose                       | 75:15:10<br>(AM:Super P:<br>PVDF) | 1 M LiPF <sub>6</sub> in<br>FEC/DMC =<br>1:4 (v/v)                                      | 3.0-5.0 | 123.8,<br>C/10 | 82.4 %<br>after<br>100<br>cycles | 17 |
| Sucrose                       | 85:10:5<br>(AM:Super<br>C45:CMC)  | 1 M LiPF <sub>6</sub> in<br>EC/DMC = 1:1<br>(v/v)                                       | 4.0-5.0 | 120,<br>C/10   | 62 %<br>after<br>112<br>cycles   | 18 |
| Tannic<br>acid                | 85:7:8<br>(AM:Super P:<br>PVDF)   | 1 M<br>LiPF <sub>3</sub> (CF <sub>2</sub> CF <sub>3</sub> )<br>in EC/DMC =<br>1:1 (v/v) | 2.6-5.2 | 155.2,<br>C/10 | 90.2 %<br>after<br>80 cycles     | 19 |
| Sucrose,<br>Graphene<br>oxide | 70:20:10<br>(AM:AB:PVDF)          | 1 M LiPF <sub>6</sub> in<br>FEC/DMC =<br>1:1 (v/v)                                      | 3.0-5.3 | 146.1,<br>C/10 | 63.2 %<br>after<br>40 cycles     | 20 |
| CMC                           | 80:10:10<br>(AM:AB:PVDF)          | 1 M LiPF <sub>6</sub> in<br>EC/DEC = 1:2<br>(v/v)                                       | 3.0-5.1 | 125.3,<br>C/10 | 38.7 %<br>after<br>100<br>cycles | 21 |
| Alginic<br>acid               | 86:7:7<br>(AM:Super P:<br>PVDF)   | 1 M<br>LiPF <sub>3</sub> (CF <sub>2</sub> CF <sub>3</sub> )<br>in EC/DMC =<br>1:1 (v/v) | 2.8-5.2 | 160,<br>C/10   | 86.4 %<br>after<br>100<br>cycles | 22 |
| CMC                           | 75:15:10<br>(AM:AB:PVDF)          | 1 M LiPF <sub>6</sub> in<br>EC/DEC = 1:2<br>(v/v)                                       | 3.0-5.1 | 135,<br>C/10   | 91.6 %<br>after<br>30 cycles     | 23 |
| Sucrose                       | 80:10:10<br>(AM:Super P:<br>PVDF) | 1 M LiPF <sub>6</sub> in<br>EC/DMC = 1:1<br>(v/v)                                       | 3.5-5.2 | 120.3,<br>C/10 | 75 %<br>after<br>20 cycles       | 24 |
| CMC                           | 80:10:10<br>(AM:Carbon:<br>PVDF)  | 1 M LiPF <sub>6</sub> in<br>EC/DEC = 1:2<br>(v/v)                                       | 3.0-5.3 | 133.7,<br>C/10 | 56.6 %<br>after<br>100<br>cycles | 25 |

|                           |                                  |                                                                               |         |               |                                   |             |
|---------------------------|----------------------------------|-------------------------------------------------------------------------------|---------|---------------|-----------------------------------|-------------|
| Sucrose,<br>PVDF,<br>CTAB | 80:10:10<br>(AM:Super<br>P:PVDF) | 1 M LiPF <sub>6</sub> in<br>EC/DEC/EMC<br>= 1:1:1 (v/v)                       | 3.5-5.0 | 120,<br>1 C   | 98.99 %<br>after<br>200<br>cycles | 26          |
| PVDF,<br>Sucrose          | 75:15:10<br>(AM:Super<br>P:PVDF) | 1 M LiPF <sub>6</sub> in<br>EC/DMC = 1:1<br>(v/v)                             | 3.5-5.0 | 129.7,<br>C/2 | 68 %<br>after<br>100<br>cycles    | 27          |
| Sucrose                   | 70:20:10<br>(AM:AB:PVDF)         | 1 M LiPF <sub>6</sub> in<br>EC/PC/DMC =<br>1:1:1 (v/v)<br>with<br>2 wt.% TMSP | 3.5-5.0 | 163,<br>1 C   | 76.36 %<br>after<br>100<br>cycles | Our<br>work |

AM: Active materials; CB: Carbon black; PVDF: Polyvinylidene difluoride; EC: Ethylene carbonate; DMC: Dimethyl carbonate; AB: Acetylene black; DEC: Diethyl carbonate; EMC: Ethyl methyl carbonate; FEC: Fluoroethylene carbonate; PEDOT: Poly(3,4-ethylenedioxythiophene); MWCNT: Multi-walled carbon nanotubes, PVP: Polyvinylpyrrolidone; PTFE: Polytetrafluoroethylene; CMC: Carboxy methyl cellulose; CTAB: Cetyltrimethylammonium bromide; TPN: Thiophene; TMSP: Tris(trimethylsilyl) phosphite

**Table S4.** Summary of Coulombic efficiency statistics and standard deviations of ST-A-LCP electrodes at different C-rates.

| <b>C-rates</b> | <b>Minimum</b> | <b>Maximum</b> | <b>Range</b> | <b>Mean value</b> |
|----------------|----------------|----------------|--------------|-------------------|
| C/10           | 58.89          | 92.74          | 33.85        | 85.12             |
| C/5            | 65.72          | 93.37          | 27.65        | 91.53             |
| C/2            | 69.79          | 97.96          | 28.17        | 97.05             |
| 1 C            | 75.22          | 99.31          | 24.09        | 98.57             |

**Table S5.** Summary of Coulombic efficiency statistics and standard deviations of ST-C-LCP electrodes at different C-rates.

| <b>C-rates</b> | <b>Minimum</b> | <b>Maximum</b> | <b>Range</b> | <b>Mean value</b> |
|----------------|----------------|----------------|--------------|-------------------|
| C/10           | 55.54          | 91.36          | 35.81        | 79.90             |
| C/5            | 66.25          | 94.64          | 28.39        | 91.58             |
| C/2            | 71.79          | 97.33          | 25.54        | 96.52             |
| 1 C            | 78.25          | 99.82          | 21.57        | 99.10             |

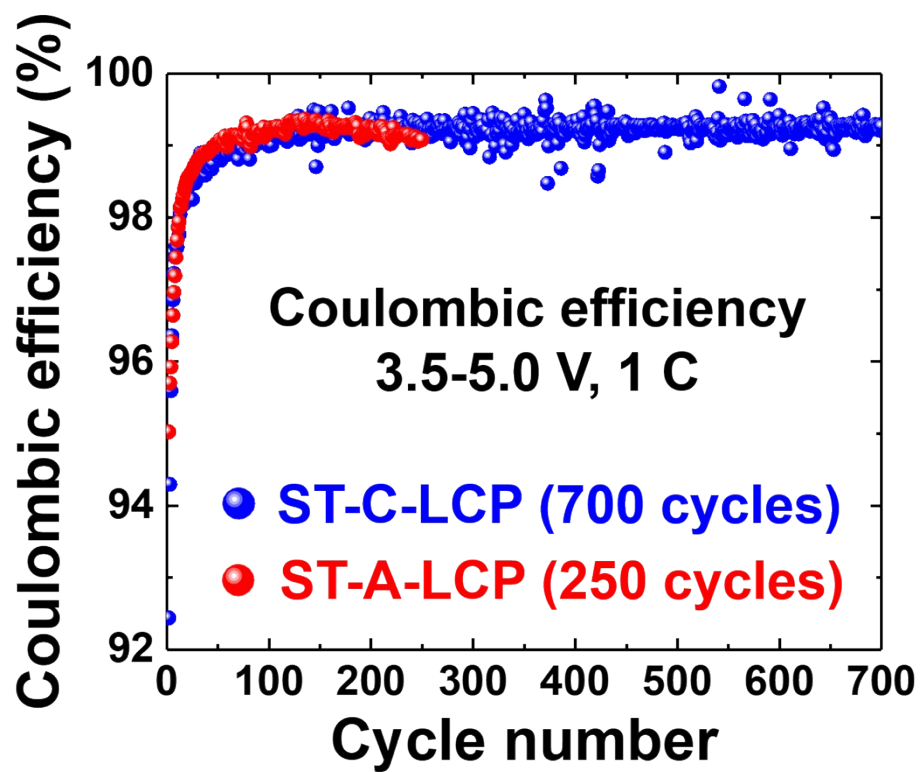

**Figure S9.** Coulombic efficiency comparison of ST-A-LCP and ST-C-LCP.

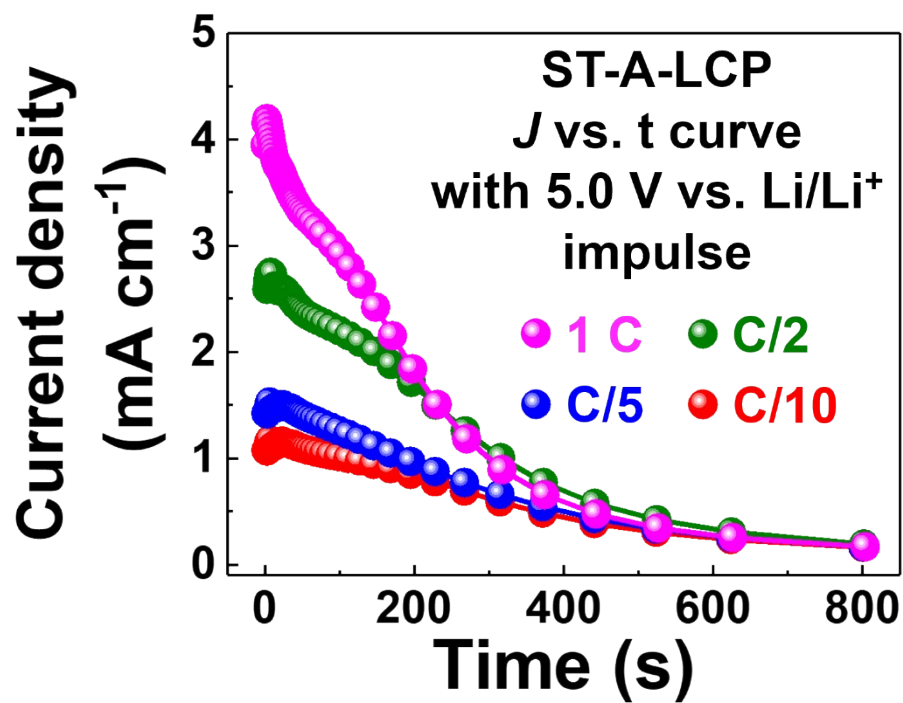

**Figure S10.** Current density vs. time (*J-t*) of cycled ST-A-LCP electrodes at different C-rates after 10 cycles, measured from the Nyquist plot with 5.0 V vs. Li/Li<sup>+</sup> impulse.

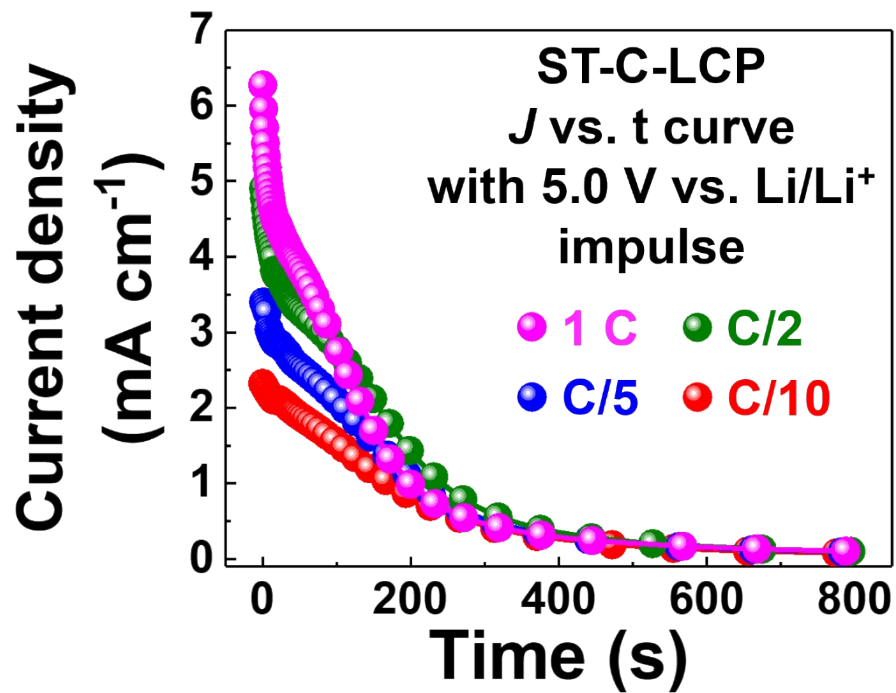

**Figure S11.** Current density vs. time ( $J-t$ ) of cycled ST-C-LCP electrodes at different C-rates after 10 cycles, measured from the Nyquist plot with 5.0 V vs. Li/Li<sup>+</sup> impulse.

**Table S6.** XPS peak data summary of pristine ST-A-LCP electrodes.

| <b>Peak</b> | <b>Bond</b>                      | <b>Binding energy<br/>(eV)</b> | <b>FWHM<br/>(eV)</b> | <b>Atomic %</b> |
|-------------|----------------------------------|--------------------------------|----------------------|-----------------|
| C 1s        | C-C & C-H                        | 284.75                         | 0.81                 | 54.5            |
|             | C-O                              | 285.70                         | 1.24                 | 14.34           |
|             | C-F                              | 286.69                         | 1.36                 | 13.00           |
|             | C=O                              | 287.73                         | 1.34                 | 2.86            |
|             | O-C=O                            | 288.98                         | 1.39                 | 2.76            |
|             | CH <sub>2</sub> -CF <sub>2</sub> | 291.09                         | 1.72                 | 12.54           |
| O 1s        | C=O & O-C=O                      | 531.85                         | 1.89                 | 96.05           |
|             | C-O                              | 533.69                         | 1.16                 | 3.95            |
| F 1s        | Li-F & Co-F                      | 685.37                         | 0.86                 | 0.65            |
|             | C-F                              | 687.93                         | 1.81                 | 97.11           |
|             | CH <sub>2</sub> -CF <sub>2</sub> | 690.21                         | 2.43                 | 2.24            |

**Table S7.** XPS peak data summary of pristine ST-C-LCP electrodes.

| <b>Peak</b> | <b>Bond</b>                      | <b>Binding energy<br/>(eV)</b> | <b>FWHM<br/>(eV)</b> | <b>Atomic %</b> |
|-------------|----------------------------------|--------------------------------|----------------------|-----------------|
| C 1s        | C-C & C-H                        | 284.81                         | 0.87                 | 62.89           |
|             | C-O                              | 285.72                         | 0.75                 | 7.60            |
|             | C-F                              | 286.40                         | 0.97                 | 7.66            |
|             | C=O                              | 287.06                         | 1.33                 | 6.66            |
|             | O-C=O                            | 288.78                         | 2.49                 | 5.40            |
|             | CH <sub>2</sub> -CF <sub>2</sub> | 291.13                         | 1.63                 | 9.79            |
| O 1s        | C=O & O-C=O                      | 531.86                         | 1.45                 | 78.74           |
|             | C-O                              | 533.25                         | 1.88                 | 21.26           |
| F 1s        | Li-F & Co-F                      | 685.84                         | 0.52                 | 0.48            |
|             | C-F                              | 687.98                         | 1.78                 | 97.70           |
|             | CH <sub>2</sub> -CF <sub>2</sub> | 689.73                         | 1.90                 | 1.82            |

**Table S8.** XPS peak data summary of ST-A-LCP electrodes after 250 cycles at 1 C.

| <b>Peak</b> | <b>Bond</b>                      | <b>Binding energy<br/>(eV)</b> | <b>FWHM<br/>(eV)</b> | <b>Atomic %</b> |
|-------------|----------------------------------|--------------------------------|----------------------|-----------------|
| C 1s        | C-C & C-H                        | 284.75                         | 1.07                 | 39.62           |
|             | C-O                              | 285.88                         | 1.09                 | 17.19           |
|             | C-F                              | 286.78                         | 1.38                 | 20.15           |
|             | C=O                              | 288.13                         | 1.19                 | 4.18            |
|             | O-C=O                            | 289.23                         | 1.14                 | 2.95            |
|             | CH <sub>2</sub> -CF <sub>2</sub> | 290.67                         | 1.29                 | 15.90           |
| O 1s        | C=O & O-C=O                      | 531.78                         | 1.64                 | 57.97           |
|             | C-O                              | 533.35                         | 1.93                 | 42.03           |
| F 1s        | Li-F & Co-F                      | 686.38                         | 3.2                  | 3.82            |
|             | C-F                              | 688.00                         | 1.89                 | 96.18           |
|             | CH <sub>2</sub> -CF <sub>2</sub> | 690.90                         | 0.62                 | 0               |

**Table S9.** XPS peak data summary of ST-C-LCP electrodes after 700 cycles at 1 C.

| <b>Peak</b> | <b>Bond</b>                      | <b>Binding energy<br/>(eV)</b> | <b>FWHM<br/>(eV)</b> | <b>Atomic %</b> |
|-------------|----------------------------------|--------------------------------|----------------------|-----------------|
| C 1s        | C-C & C-H                        | 284.75                         | 0.94                 | 35.94           |
|             | C-O                              | 285.93                         | 1.27                 | 17.20           |
|             | C-F                              | 286.76                         | 1.21                 | 18.26           |
|             | C=O                              | 287.71                         | 1.11                 | 3.68            |
|             | O-C=O                            | 289.11                         | 2.09                 | 5.85            |
|             | CH <sub>2</sub> -CF <sub>2</sub> | 290.96                         | 1.27                 | 19.07           |
| O 1s        | C=O & O-C=O                      | 531.91                         | 1.71                 | 57.92           |
|             | C-O                              | 533.59                         | 1.99                 | 42.08           |
| F 1s        | Li-F & Co-F                      | 685.95                         | 1.6                  | 18.94           |
|             | C-F                              | 688.00                         | 1.84                 | 80.94           |
|             | CH <sub>2</sub> -CF <sub>2</sub> | 690.58                         | 0.51                 | 0.12            |

**a**

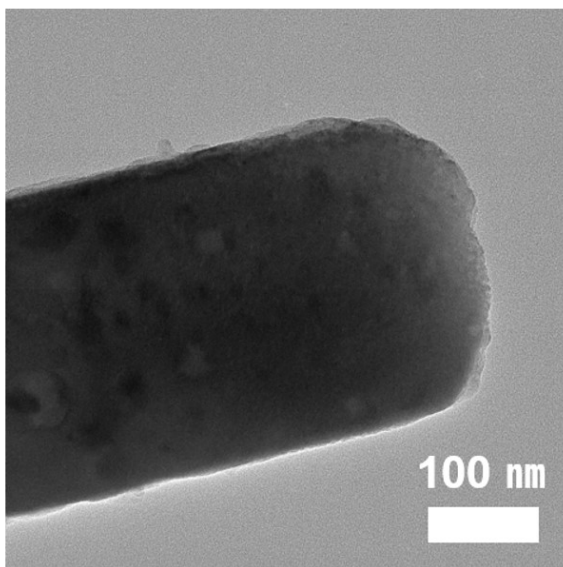

**b**

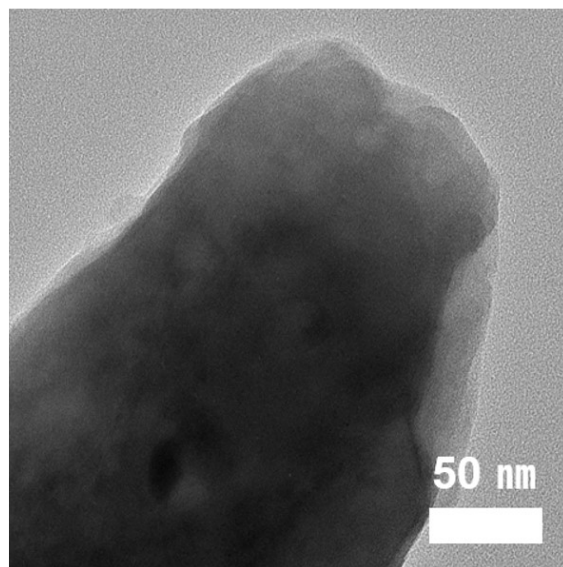

**Figure S12.** HRTEM images of (a) ST-C-LCP and (b) ST-A-LCP samples after 100 cycles at 1 C.

**Table S10.** XPS peak data summary of collected separator from the cycled cells with ST-A-LCP cathode after 100 cycles at 1 C.

| Peak                 | Bond                  | Binding energy<br>(eV) | FWHM<br>(eV) | Atomic % |
|----------------------|-----------------------|------------------------|--------------|----------|
| Co 2p <sub>3/2</sub> | Co <sup>3+</sup>      | 780.94                 | 2.27         | 14.84    |
|                      | Co <sup>2+</sup>      | 782.39                 | 3.37         | 27.16    |
|                      | Co <sup>3+</sup> Sat. | 785.71                 | 3.37         | 16.06    |
|                      | Co <sup>2+</sup> Sat. | 788.76                 | 3.37         | 8.88     |
| Co 2p <sub>1/2</sub> | Co <sup>3+</sup>      | 796.95                 | 2.33         | 5.73     |
|                      | Co <sup>2+</sup>      | 797.77                 | 2.56         | 10.39    |
|                      | Co <sup>3+</sup> Sat. | 800.71                 | 3.37         | 8.58     |
|                      | Co <sup>2+</sup> Sat. | 804.06                 | 3.37         | 8.36     |

\*Sat.: Satellite

## Reference

1. A. V. Murugan, T. Muraliganth, P. J. Ferreira and A. Manthiram, *Inorg. Chem.*, 2009, **48**, 3, 946-952.
2. A. V. Murugan, T. Muraliganth and A. Manthiram, *J. Electrochem. Soc.*, 2009, **156**, A79-A83.
3. F. Wang, J. Yang, Y. NuLi and J. Wang, *J. Power Sources*, 2011, **196**, 4806-4810.
4. T. N. L. Doan and I. Taniguchi, *J. Power Sources*, 2011, **196**, 5679-5684.
5. J. Liu, T. E. Conry, X. Song, L. Yang, M. M. Doeff and T. J. Richardson, *J. Mater. Chem.*, 2011, **21**, 9984-9987.
6. M. Li, *Ionics*, 2012, **18**, 507-512.
7. M. K. Devaraju, D. Rangappa and I. Honma, *Electrochim. Acta*, 2012, **85**, 548-553.
8. S.-M. Oh, S.-T. Myung and Y.-K. Sun, *J. Mater. Chem.*, 2012, **22**, 14932-14937.
9. L.Y. Xing, M. Hu, Q. Tang, J. P. Wei, X. Qin and Z. Zhou, *Electrochim. Acta*, 2012, **59**, 172-178.
10. T. N. L. Doan and I. Taniguchi, *Powder Technol.*, 2012, **217**, 574-580.
11. J. Ni, H. Wang, L. Gao and L. Lu, *Electrochim. Acta*, 2012, **70**, 349-354.
12. X. Rui, X. Zhao, Z. Lu, H. Tan, D. Sim, H. H. Hng, R. Yazami, T. M. Lim and Q. Yan, *ACS Nano*, 2013, **7**, 5637-5646.
13. R. Tussupbayev and I. Taniguchi, *J. Power Sources*, 2013, **236**, 276-284.
14. J. Ni, L. Gao and L. Lu, *J. Power Sources*, 2013, **221**, 35-41.
15. Q. D. Truong, M. K. Devaraju, Y. Ganbe, T. Tomai and I. Honma, *Sci. Rep.*, 2014, **4**, 3975.
16. S. M. Rommel, J. Rothballer, N. Schall, C. Brünig and R. Wehrich, *Ionics*, 2015, **21**, 325-333.
17. B. Wu, H. Xu, D. Mu, L. Shi, B. Jiang, L. Gai, L. Wang, Q. Liu, L. Ben and F. Wu, *J. Power Sources*, 2016, **304**, 181-188.
18. N. Laszczynski, A. Birrozzi, K. Maranski, M. Copley, M. E. Schusterd and S. Passerini, *J. Mater. Chem. A*, 2016, **4**, 17121-17128.
19. A. yrnek, A. Yefildal, M. Can and S. Aktürk, *Mater. Res. Bull.*, 2016, **83**, 1-11.
20. H. Chen, M. Chen, C. Du, Y. Cui, P. Zuo, X. Cheng and G. Yin, *Mater. Chem. Phys.*, 2016, **171**, 6-10.
21. Y. Maeyoshi, S. Miyamoto, H. Munakata and K. Kanamura, *J. Power Sources*, 2017, **350**, 103-108.

22. A. Ornek, *J. Alloys Compd.*, 2017, **710**, 809-818.
23. Y. Maeyoshi, S. Miyamoto, Y. Noda, H. Munakata and K. Kanamura, *J. Power Sources*, 2017, **337**, 92-99.
24. X. Wu, F. Rohman, M. Meledina, H. Tempel, R. Schierholz, H. Kungl, J. Mayer and R.-A. Eichel, *Electrochim. Acta*, 2018, **279**, 108-117.
25. Y. Maeyoshi, S. Miyamoto, H. Munakata and K. Kanamura, *J. Power Sources*, 2018, **376**, 18-25.
26. W. Sun, S. Cui, Y. Xing, D. Sun, W. Liu and Y. Jin, *J. Power Sources*, 2024, **602**, 234378.
27. L. Dong, S. Cui, Y. Xing, F. Ma, Y. Wang, D. Sun and Y. Jin, *J. Energy Storage*, 2025, **129**, 117393.
